# Supplementary material for: The Pagerank-Index: Going beyond Citation Counts in Quantifying Scientific Impact of Researchers
Source: PubMed Central journal article supplement (PMC4545754; doi:10.1371/journal.pone.0134794), 2015-08-19
Supplement: pone.0134794.s002.pdf [file pone.0134794.s002.pdf]

# The pagerank-index: Going beyond citation counts in quantifying scientific impact of researchers

## Supplementary material

Upul Senanayake, Mahendra Piraveenan, Albert Zomaya

May 3, 2015

This document provides some supplementary information, including additional results which could not be included in the paper due to space restrictions.

### Citation and collaboration networks

The following tables present the topological properties for the citation and collaboration networks generated during the three scenarios of the simulation experiments. As the paper describes a typical experiment for each scenario, the properties of the network generated for that particular experiment are shown here. The properties are not averaged.

| Property                   | Value                  |
|----------------------------|------------------------|
| Number of nodes            | 25000                  |
| Number of edges            | 97555                  |
| Average degree             | 7.805                  |
| Characteristic path length | 1.648                  |
| Clustering coefficient     | 0.0                    |
| Network diameter           | 8                      |
| Power law fit              | $P(k) \sim k^{-1.847}$ |

Table 1: Characteristics of the citation network from scenario 1 in the simulation experiments.

| Property                   | Value |
|----------------------------|-------|
| Number of nodes            | 2134  |
| Number of edges            | 86546 |
| Network heterogeneity      | 0.844 |
| Characteristic path length | 2.287 |
| Clustering coefficient     | 0.183 |
| Network diameter           | 6     |
| Network Density            | 0.038 |

Table 2: Characteristics of the collaboration network from scenario 1 in the simulation experiments.

| Property                   | Value                  |
|----------------------------|------------------------|
| Number of nodes            | 25000                  |
| Number of edges            | 20015                  |
| Average degree             | 1.601                  |
| Characteristic path length | 1.0                    |
| Clustering coefficient     | 0.0                    |
| Network diameter           | 1                      |
| Power law fit              | $P(k) \sim k^{-1.503}$ |

Table 3: Characteristics of the citation network for the second scenario in simulation experiments.

| Property                   | Value  |
|----------------------------|--------|
| Number of nodes            | 2253   |
| Number of edges            | 214126 |
| Network heterogeneity      | 0.782  |
| Characteristic path length | 2.235  |
| Clustering coefficient     | 0.278  |
| Network diameter           | 6      |
| Network Density            | 0.084  |

Table 4: Characteristics of the collaboration network for the second scenario in simulation experiments.

| Property                   | Value                  |
|----------------------------|------------------------|
| Number of nodes            | 25000                  |
| Number of edges            | 20431                  |
| Average degree             | 1.635                  |
| Characteristic path length | 1.0                    |
| Clustering coefficient     | 0.0                    |
| Network diameter           | 1                      |
| Power law fit              | $P(k) \sim k^{-0.947}$ |

Table 5: Characteristics of the citation network for the third scenario in a single run of simulation experiments.

| Property                   | Value |
|----------------------------|-------|
| Number of nodes            | 1662  |
| Number of edges            | 78280 |
| Network heterogeneity      | 0.966 |
| Characteristic path length | 2.246 |
| Clustering coefficient     | 0.269 |
| Network diameter           | 5     |
| Network Density            | 0.057 |

Table 6: Characteristics of the collaboration network for the third scenario in a single run of simulation experiments.

| Property                   | Value                  |
|----------------------------|------------------------|
| Number of nodes            | 27770                  |
| Number of edges            | 352285                 |
| Average degree             | 25.372                 |
| Characteristic path length | 6.460                  |
| Clustering coefficient     | 0.156                  |
| Network diameter           | 33                     |
| Power law fit              | $P(k) \sim k^{-1.585}$ |

Table 7: Characteristics of the citation network generated from HEP-TH dataset.

| Property                   | Value |
|----------------------------|-------|
| Number of nodes            | 13524 |
| Number of edges            | 24883 |
| Network heterogeneity      | 1.119 |
| Characteristic path length | 7.481 |
| Clustering coefficient     | 0.489 |
| Network diameter           | 26    |
| Network Density            | 0.009 |

Table 8: Characteristics of the collaboration network generated from HEP-TH dataset.

The following figures present the corresponding degree-distributions for citation and collaboration networks.

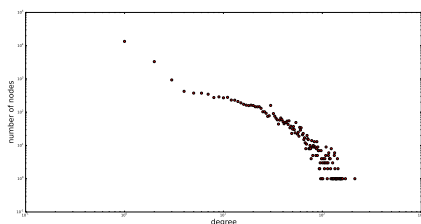

Figure 1: Degree distribution of the citation network for the first scenario in a single run of simulation experiments plotted in log-log scale.

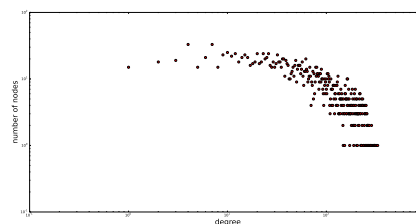

Figure 2: Degree distribution of the collaboration network for the first scenario in a single run of simulation experiments plotted in log-log scale.

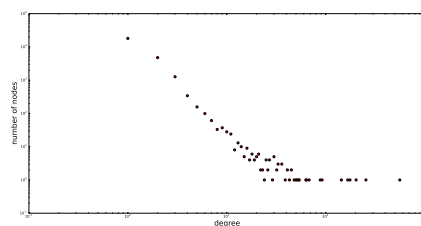

Figure 3: Degree distribution of the citation network for the second scenario in a single run of simulation experiments plotted in log-log scale.

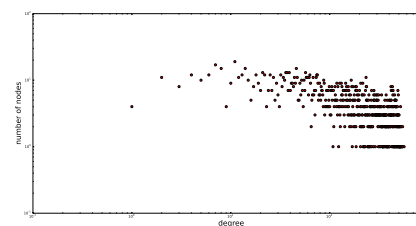

Figure 4: Degree distribution of the collaboration network for the second scenario in a single run of simulation experiments plotted in log-log scale.

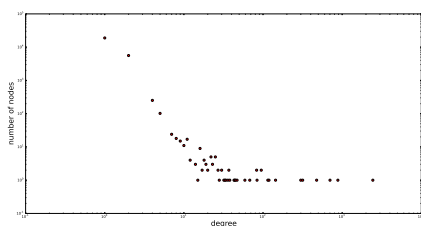

Figure 5: Degree distribution of the citation network for the third scenario in a single run of simulation experiments plotted in log-log scale.

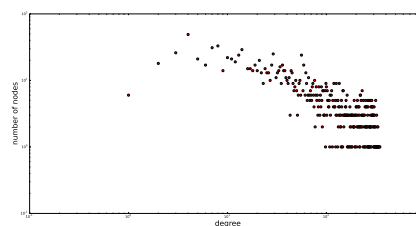

Figure 6: Degree distribution of the collaboration network for the third scenario in a single run of simulation experiments plotted in log-log scale.

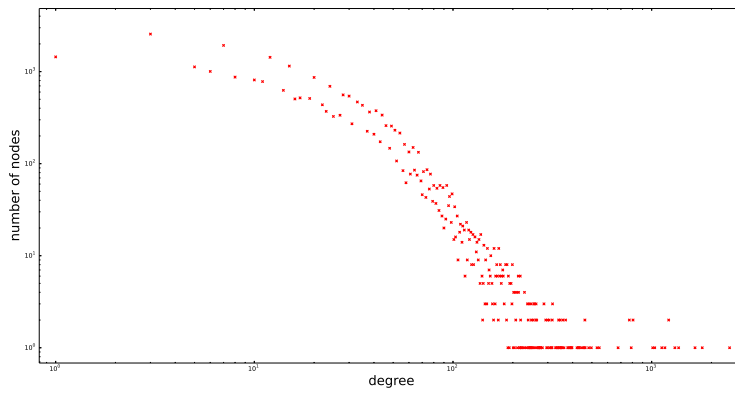

Figure 7: The degree distribution of the HEP-TH citation network plotted in log-log scale.
